# Supplementary material for: Proteomic Analysis of the Predatory Venom of Conus striatus Reveals Novel and Population-Specific κA-Conotoxin SIVC
Source: MDPI journal article supplement (doi:10.3390/toxins14110799), 2022-11-17
Supplement: s1 [file s1]

# Supplementary Materials: Proteomic Analysis of the Predatory Venom of *Conus striatus* Reveals Novel and Population-Specific $\kappa$ A-Conotoxin SIVC

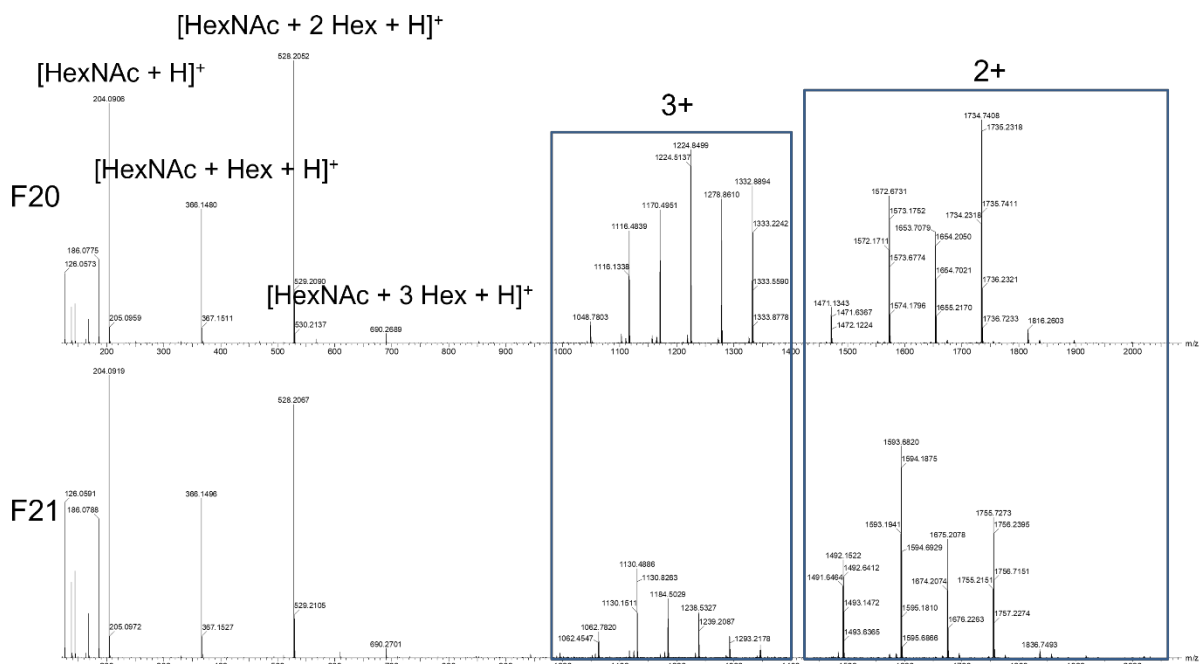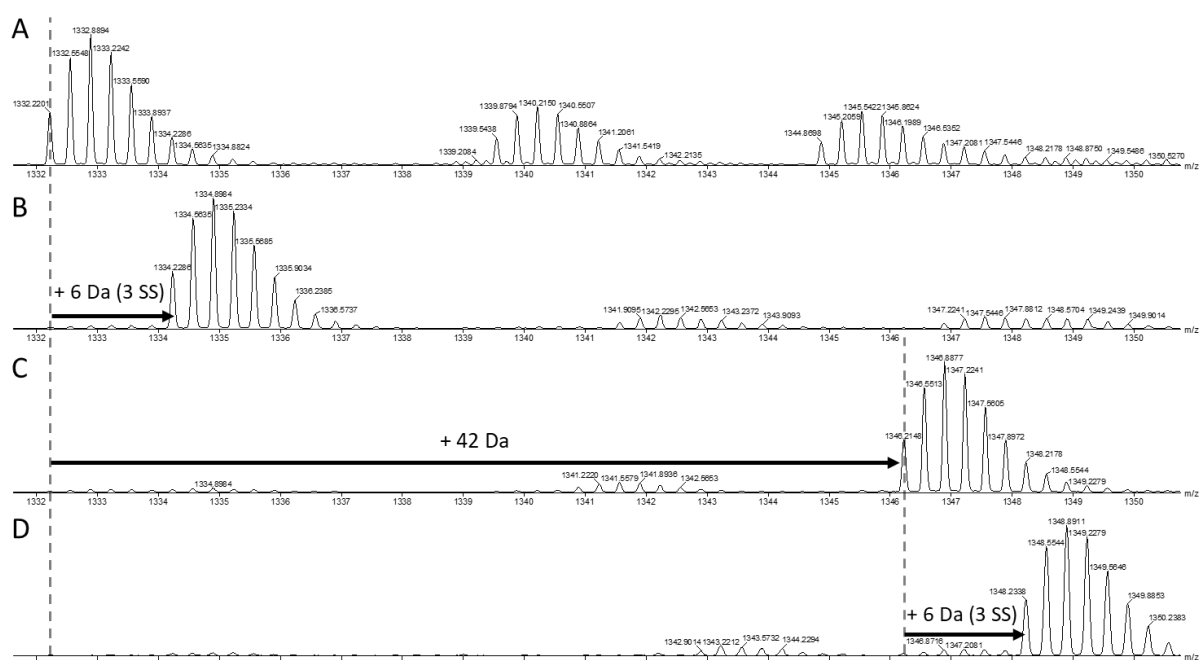

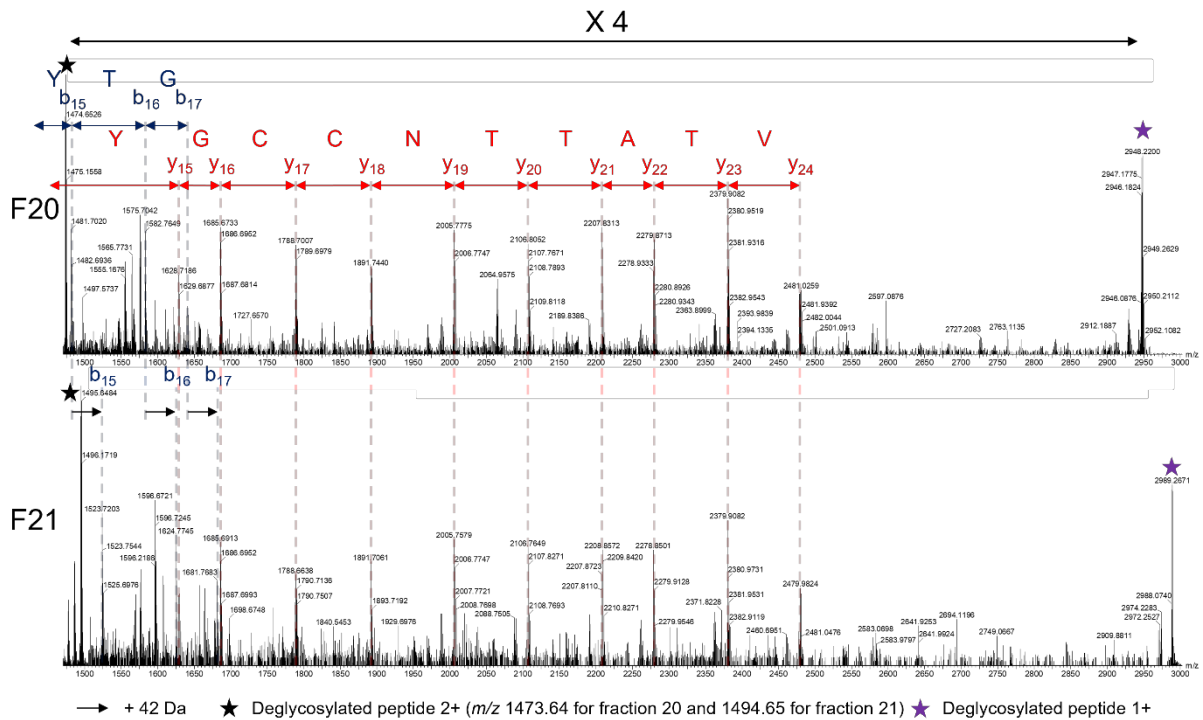

**Figure S3.** MSMS (CID) spectra of the 3+ reduced peptides from the fractions 20 ( $m/z$  1334, top) and 21 ( $m/z$  1348, bottom) of the *Conus striatus* crude venom. The b ions are in blue and the y ions in red. Some b and y ions are not highlighted due to their low intensity.

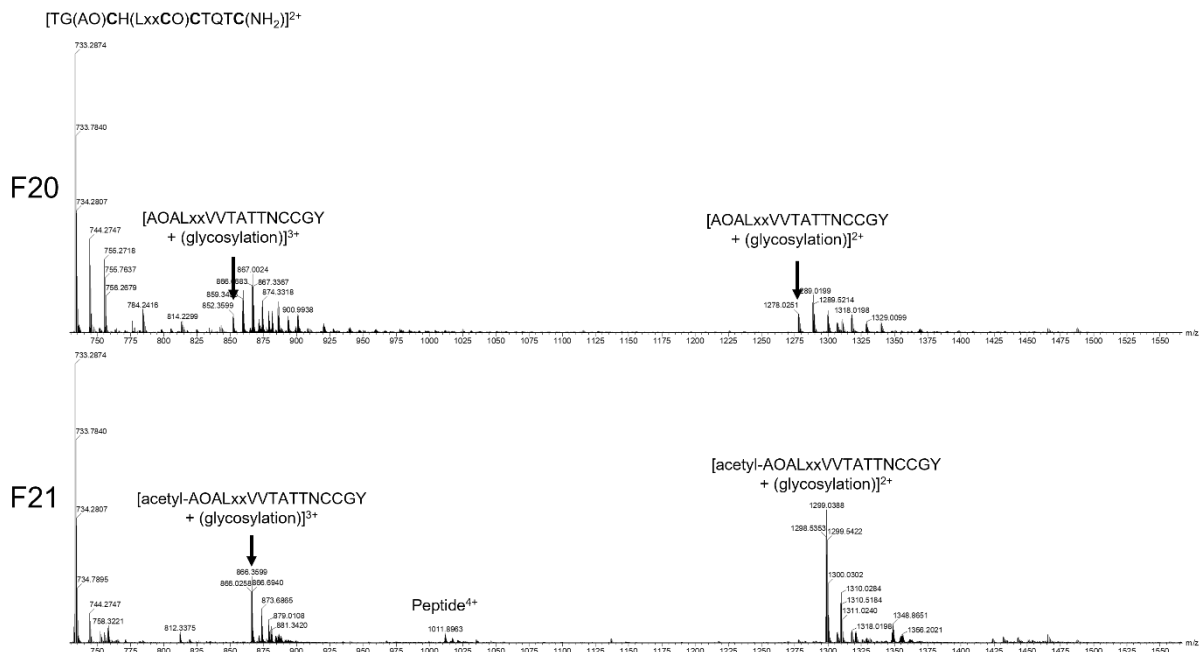

**Figure S4.** mass spectra of the fractions 20 (top) and 21 (bottom) of the *Conus striatus* crude venom digested 7 h by  $\alpha$ -chymotrypsin.

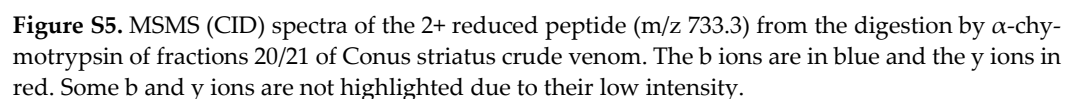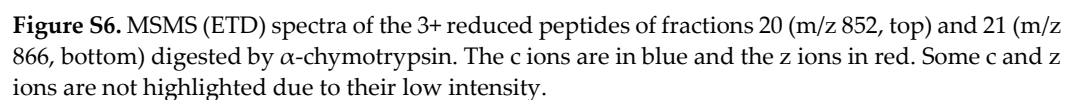

**Table S1.** m/z of the peptide ions and the different sugars losses for the fractions 20 and 21 from Mayotte. The shaded values are the observed ions in the MSMS spectra (Figure S1).

|                       | F20                |                      |                      | F21                |                      |                      |
|-----------------------|--------------------|----------------------|----------------------|--------------------|----------------------|----------------------|
|                       | [M+H] <sup>+</sup> | [M+2H] <sup>2+</sup> | [M+3H] <sup>3+</sup> | [M+H] <sup>+</sup> | [M+2H] <sup>2+</sup> | [M+3H] <sup>3+</sup> |
| Peptide               | 3994.6             | 1997.8               | 1332.2               | 4036.6             | 2018.8               | 1346.2               |
| - Hex                 | 3832.6             | 1916.8               | 1278.2               | 3874.6             | 1937.8               | 1292.2               |
| - 2 Hex               | 3670.5             | 1835.8               | 1224.2               | 3712.5             | 1856.8               | 1238.2               |
| - 3 Hex               | 3508.5             | 1754.7               | 1170.2               | 3550.5             | 1775.7               | 1184.2               |
| - 4 Hex               | 3346.4             | 1673.7               | 1116.1               | 3388.4             | 1694.7               | 1130.1               |
| - 4 Hex<br>- HexNAc   | 3143.3             | 1572.2               | 1048.4               | 3185.3             | 1593.2               | 1062.4               |
| - 4 Hex<br>- 2 HexNAc | 2940.2             | 1470.6               | 980.7                | 2982.2             | 1491.6               | 994.7                |
| - Hex<br>- HexNAc     | 3629.5             | 1815.2               | 1210.5               | 3671.5             | 1836.2               | 1224.5               |
| - 2 Hex<br>- HexNAc   | 3467.4             | 1734.2               | 1156.5               | 3509.4             | 1755.2               | 1170.5               |
| - 3 Hex<br>- HexNAc   | 3305.4             | 1653.2               | 1102.5               | 3347.4             | 1674.2               | 1116.5               |
